# Supplementary material for: Graphene-Reinforced Biodegradable Resin Composites for Stereolithographic 3D Printing of Bone Structure Scaffolds
Source: Hindawi journal article supplement (doi:10.1155/2019/9710264), 2019-04-11
Supplement: f1 [file 9710264.f1.doc]

**Supplementary information**

Graphene Reinforced Biodegradable Resin Composites for Stereolithographic 3D Printing of Bone Structure Scaffolds

Zuying Feng1,2, Yan Li1*, Liang Hao1*, Yihu Yang3, Tian Tang1, Danna Tang1, Wei Xiong1

1 Gemmological Institute, China University of Geosciences, Wuhan, 430074, P. R. China.

2 Engineering Research Centre of Nano-Geomaterials of Ministry of Education, Faculty of Materials Science and Chemistry, China University of Geosciences, Wuhan 430074, P. R. China.

3 Shenzhen Esun Industrial Co.Ltd, Shenzhen, 518000, P. R. China.

Correspondence should be addressed to Yan LI; [yanli@cug.edu.cn](mailto:yanli@cug.edu.cn)

**Content**

**Figures**

**Fig. S1.** Photograph of(a) direct casting specimens

**Fig. S2.** Optical images of the tensile fractured lateral view (g) X-0.02 specimen (h) X-0.05 specimen (i) direct casting specimen

**Fig. S3.** Water contact angles of UV-cured resin.

**Fig. S4.** Images of sternum with a round architecture using a commercial resin (a) photography (b) optical microscopy image.

**Tables**

**Table S1** The formulation and physical properties of the UV-cured resin.

**Table S2** The dimensions of tensile test X-0.02 specimens

**Table S3** The dimensions of tensile test X-0.05 specimens

**Table S4** The dimensions of flexural test X-0.02 specimens

**Table S5** The dimensions of flexural test X-0.05 specimens

**Table S6** The dimensions of flexural test Y-0.02 specimens

**Table S7** The dimensions of flexural test Y-0.05 specimens

**
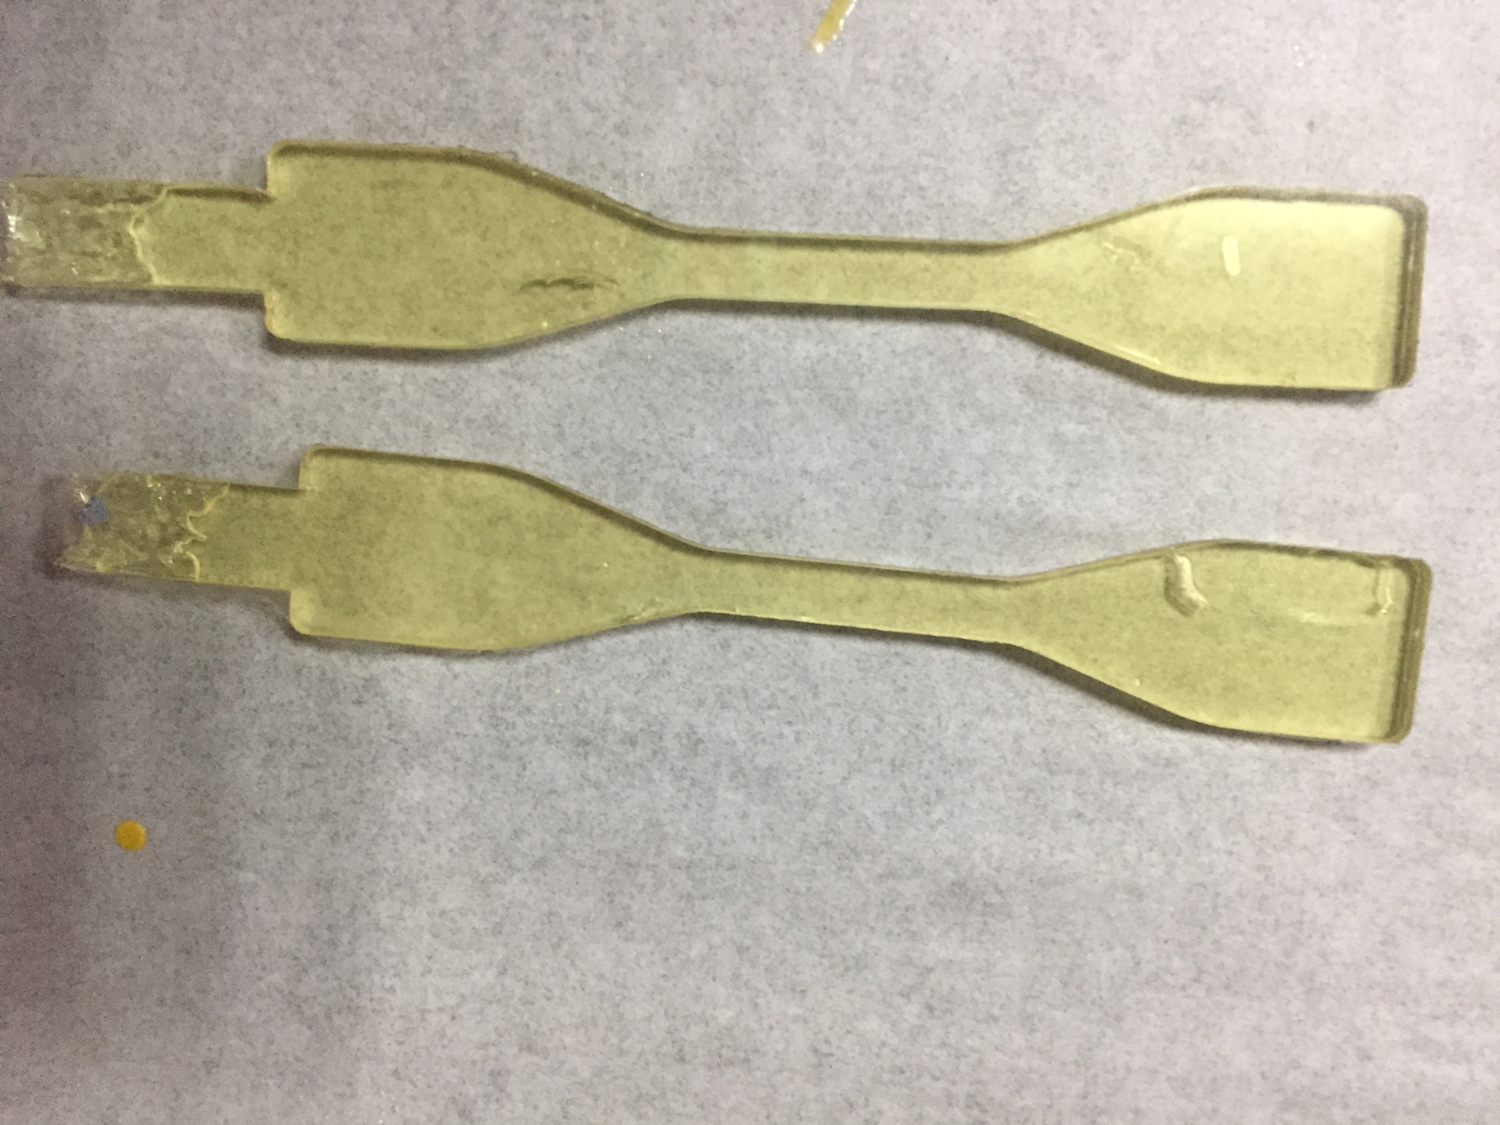
**

**Fig. S1.** Photograph of direct casting specimens.


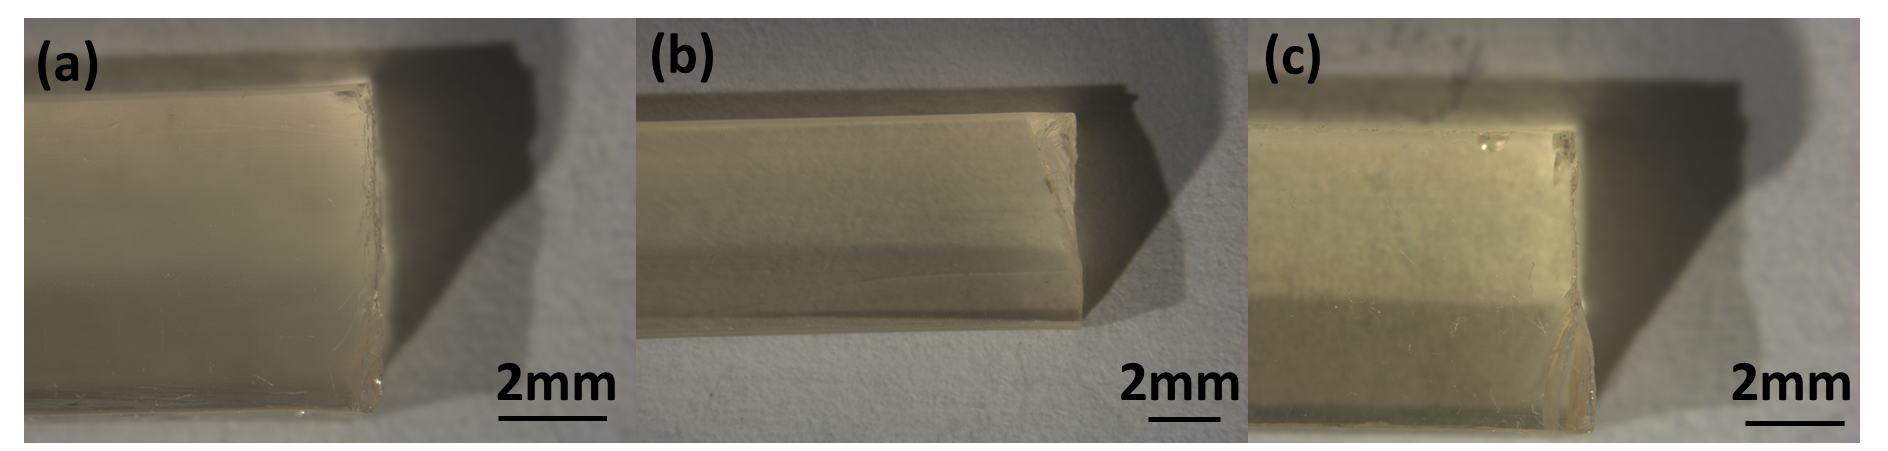


**Fig. S2.** Optical images of the tensile fractured lateral view (a) X-0.02 specimen, (b) X-0.05 specimen and (c) direct casting specimen.


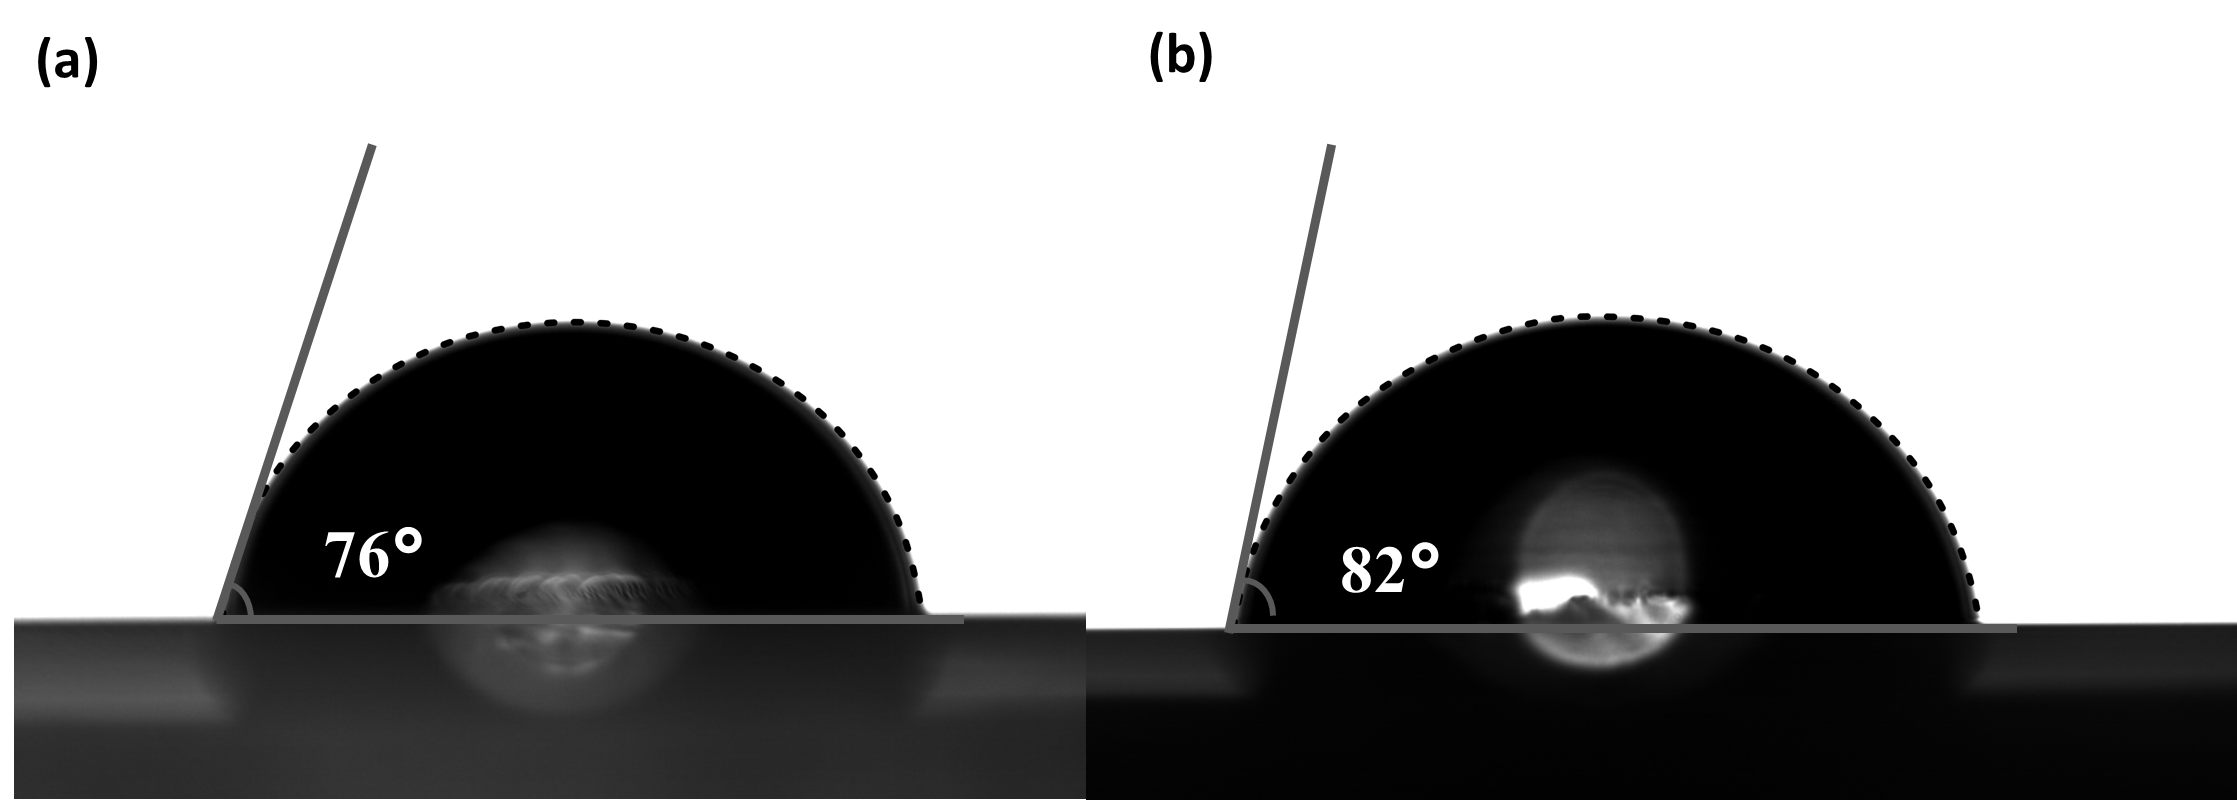


**Fig. S3.** Water contact angles of (a) pure liquid resin (b) liquid resin with 0.5 wt.% graphene.


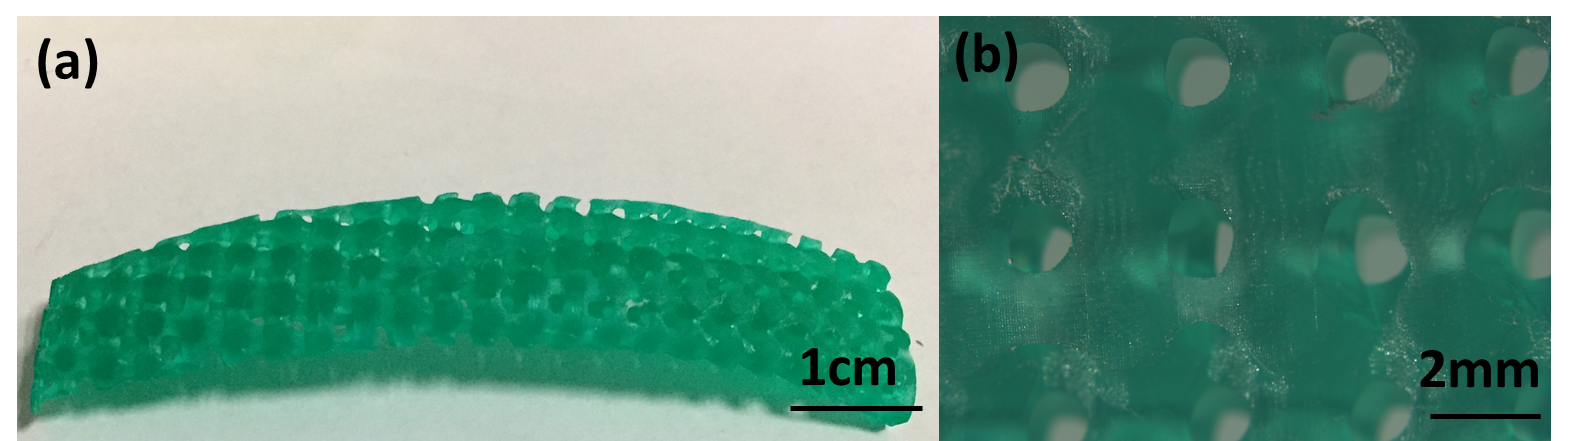


**Fig. S4.** Images of sternum with a round architecture using a commercial resin (a) photography and (b) optical microscopy image.

## Tables

**Table S1** The formulation and physical properties of the UV-cured resin.

| **Diluent** | **Diluent**  **wt.%** | **Oligomer**  **wt.%** | **Initiator**  **wt.%** | **Viscosity** | **Strength** | **Tenacity** | **Curing time(s)** | **smell** | **Hardness** | **Comments** |
| --- | --- | --- | --- | --- | --- | --- | --- | --- | --- | --- |
| THFA | 37 | 62 | 1 | low | medium | ductile | 15 | pungent | 67d | good |
| TEGDMA | 37 | 62 | 1 | medium | strong | ductile | 19 |  | 82d | best |
| TMPTA | 37 | 62 | 1 | medium | strong | brittle | 22 |  | 85d | good |
| EGDMA | 37 | 62 | 1 | low | vary strong | brittle | 25 | pungent | 75d | good |
| LMA | 37 | 62 | 1 | low | medium | ductile | 67 |  | 62d | poor |
| TMPTMA | 37 | 62 | 1 | high | strong | brittle | 107 |  | 70d | poor |
| THFA | 62 | 37 | 1 | very low | medium | ductile | 53 | pungent | 35D/85A | good |
| TEGDMA | 62 | 37 | 1 | very low | medium | brittle | 78 |  | 75d | poor |
| LMA | 62 | 37 | 1 | immiscible | weak | brittle | 107 |  | 60d | poor |
| TMPTMA | 62 | 37 | 1 | medium | weak | vary brittle | 150 |  | - | poor |

In this experiment PLA-PUA was chosen as oligomer.

**Table S2** The dimensions of tensile test X-0.02 specimens

| No. | Width of narrow section (mm) | Thickness (mm) |
| --- | --- | --- |
| 1 | 6.23 | 4.03 |
| 2 | 6.13 | 3.59 |
| 3 | 6.23 | 3.95 |
| 4 | 6.07 | 3.87 |
| 5 | 6.09 | 3.86 |
| 6 | 6.08 | 3.87 |

**Table S3** The dimensions of tensile test X-0.05 specimens

| No. | Width of narrow section (mm) | Thickness (mm) |
| --- | --- | --- |
| 1 | 6.06 | 3.52 |
| 2 | 6.20 | 3.51 |
| 3 | 6.12 | 3.25 |
| 4 | 6.23 | 3.28 |
| 5 | 6.18 | 3.28 |
| 6 | 6.07 | 3.34 |

**Table S4** The dimensions of flexural test X-0.02 specimens

| No. | Length (mm) | Width (mm) | Thickness (mm) |
| --- | --- | --- | --- |
| 1 | 80.63 | 13.53 | 3.31 |
| 2 | 80.59 | 13.68 | 3.53 |
| 3 | 80.67 | 13.72 | 3.50 |
| 4 | 80.55 | 13.59 | 3.41 |
| 5 | 80.43 | 13.42 | 3.22 |
| 6 | 80.53 | 13.58 | 3.45 |

**Table S5** The dimensions of flexural test X-0.05 specimens

| No. | Length (mm) | Width (mm) | Thickness (mm) |
| --- | --- | --- | --- |
| 1 | 80.40 | 13.38 | 2.57 |
| 2 | 80.45 | 13.58 | 2.43 |
| 3 | 80.36 | 13.46 | 2.61 |
| 4 | 80.51 | 13.56 | 2.53 |
| 5 | 80.46 | 13.66 | 2.65 |
| 6 | 80.51 | 13.58 | 2.55 |

**Table S6** The dimensions of flexural test Y-0.02 specimens

| No. | Length (mm) | Width (mm) | Thickness (mm) |
| --- | --- | --- | --- |
| 1 | 80.58 | 12.54 | 3.57 |
| 2 | 80.58 | 11.88 | 3.61 |
| 3 | 80.46 | 12.08 | 3.64 |
| 4 | 80.60 | 12.72 | 3.52 |
| 5 | 80.68 | 12.36 | 3.66 |

**Table S7** The dimensions of flexural test Y-0.05 specimens

| No. | Length (mm) | Width (mm) | Thickness (mm) |
| --- | --- | --- | --- |
| 1 | 80.72 | 12.43 | 3.57 |
| 2 | 80.74 | 12.16 | 3.71 |
| 3 | 80.57 | 12.58 | 3.52 |
| 4 | 80.72 | 11.81 | 3.71 |
| 5 | 80.66 | 11.60 | 3.63 |
| 6 | 80.57 | 12.01 | 3.68 |
